# Supplementary material for: MITgcm-RN v1.0: Modeling the Transport and Fate of Radionuclides Released from Nuclear Power Plants Wastewater in the Global Ocean Using MITgcm_c65i with the Radionuclide Module
Source: Copernicus journal article supplement (doi:10.5194/egusphere-2025-3307), 2025-08-05
Supplement: Supplementary file 1 [file egusphere-2025-3307-supplement.pdf]

Supporting Information for

**MITgcm-RN v1.0: Modeling the Transport and Fate of Radionuclides  
Released from Nuclear Power Plants Wastewater in the Global Ocean Using  
MITgcm\_c65i with the Radionuclide Module**

Mao Mao<sup>12#</sup>, Yajuan Wang<sup>2#\*</sup>, Peipei Wu<sup>3</sup>, Shaojian Huang<sup>2</sup>, Zhengcheng Song<sup>2</sup>, Yanxu Zhang<sup>1\*</sup>

<sup>1</sup>Department of Earth and Environmental Sciences, Tulane University, New Orleans, LA, 70118, USA

<sup>2</sup>School of Atmospheric Sciences, Nanjing University, Nanjing, Jiangsu, 210023, China

<sup>3</sup>Scripps Institution of Oceanography, University of California, San Diego, La Jolla, CA 92093, USA

\*Corresponding author: [yzhang127@tulane.edu](mailto:yzhang127@tulane.edu) (Y. Z.); [yjwang@smail.nju.edu.cn](mailto:yjwang@smail.nju.edu.cn) (Y.W.)

<sup>#</sup>These authors contributed equally to this work.

## Dissolved(Low-end estimate)

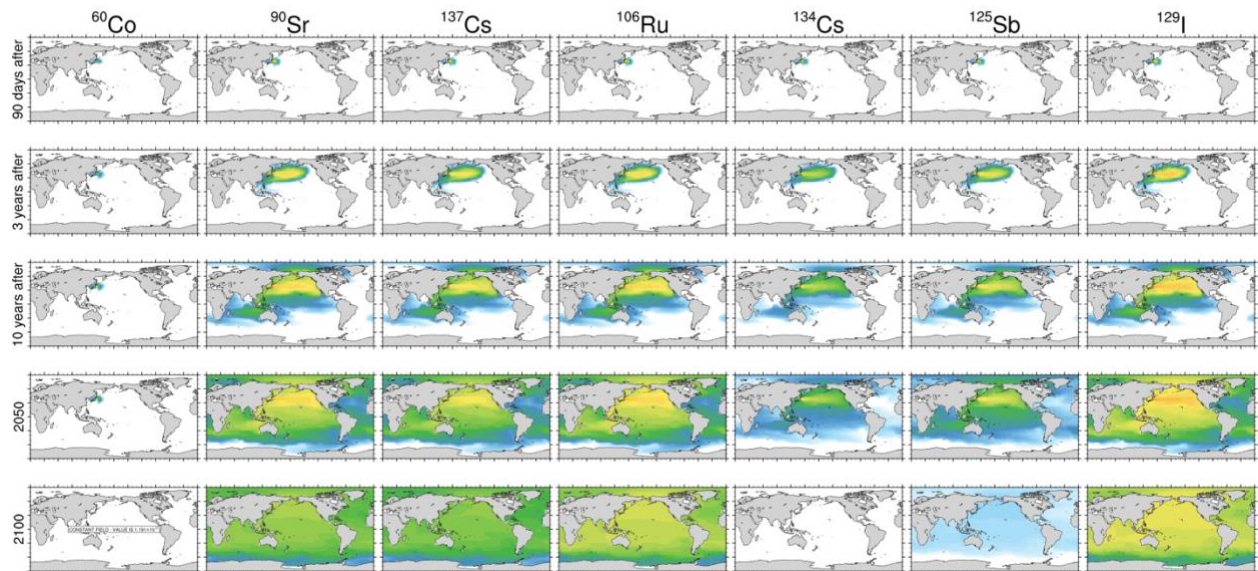

## Dissolved(Intermediate estimate)

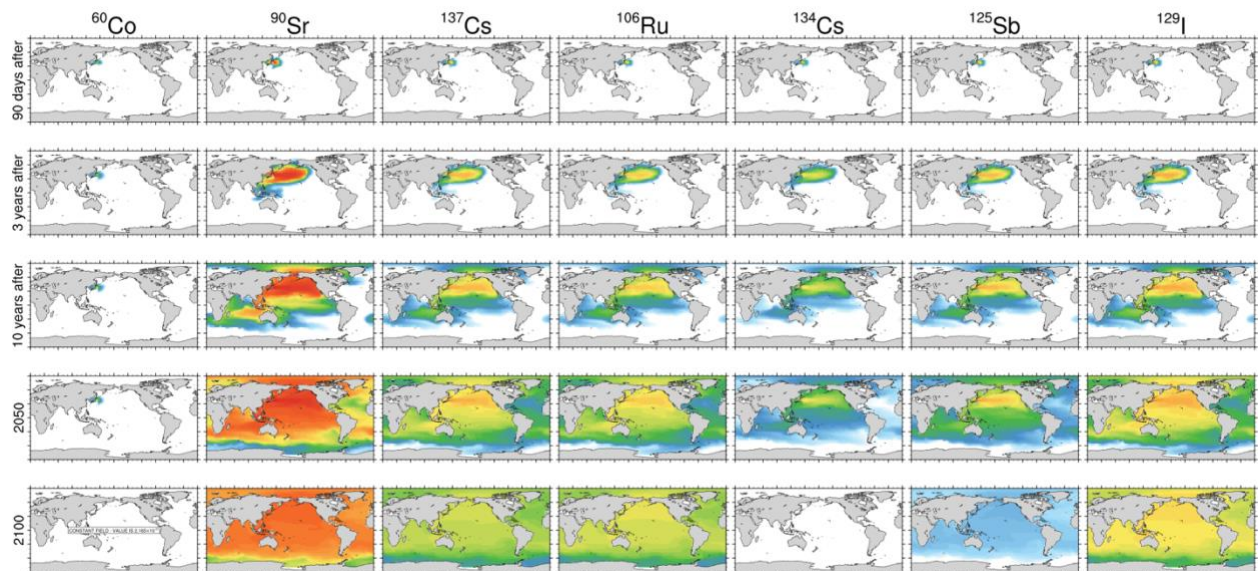

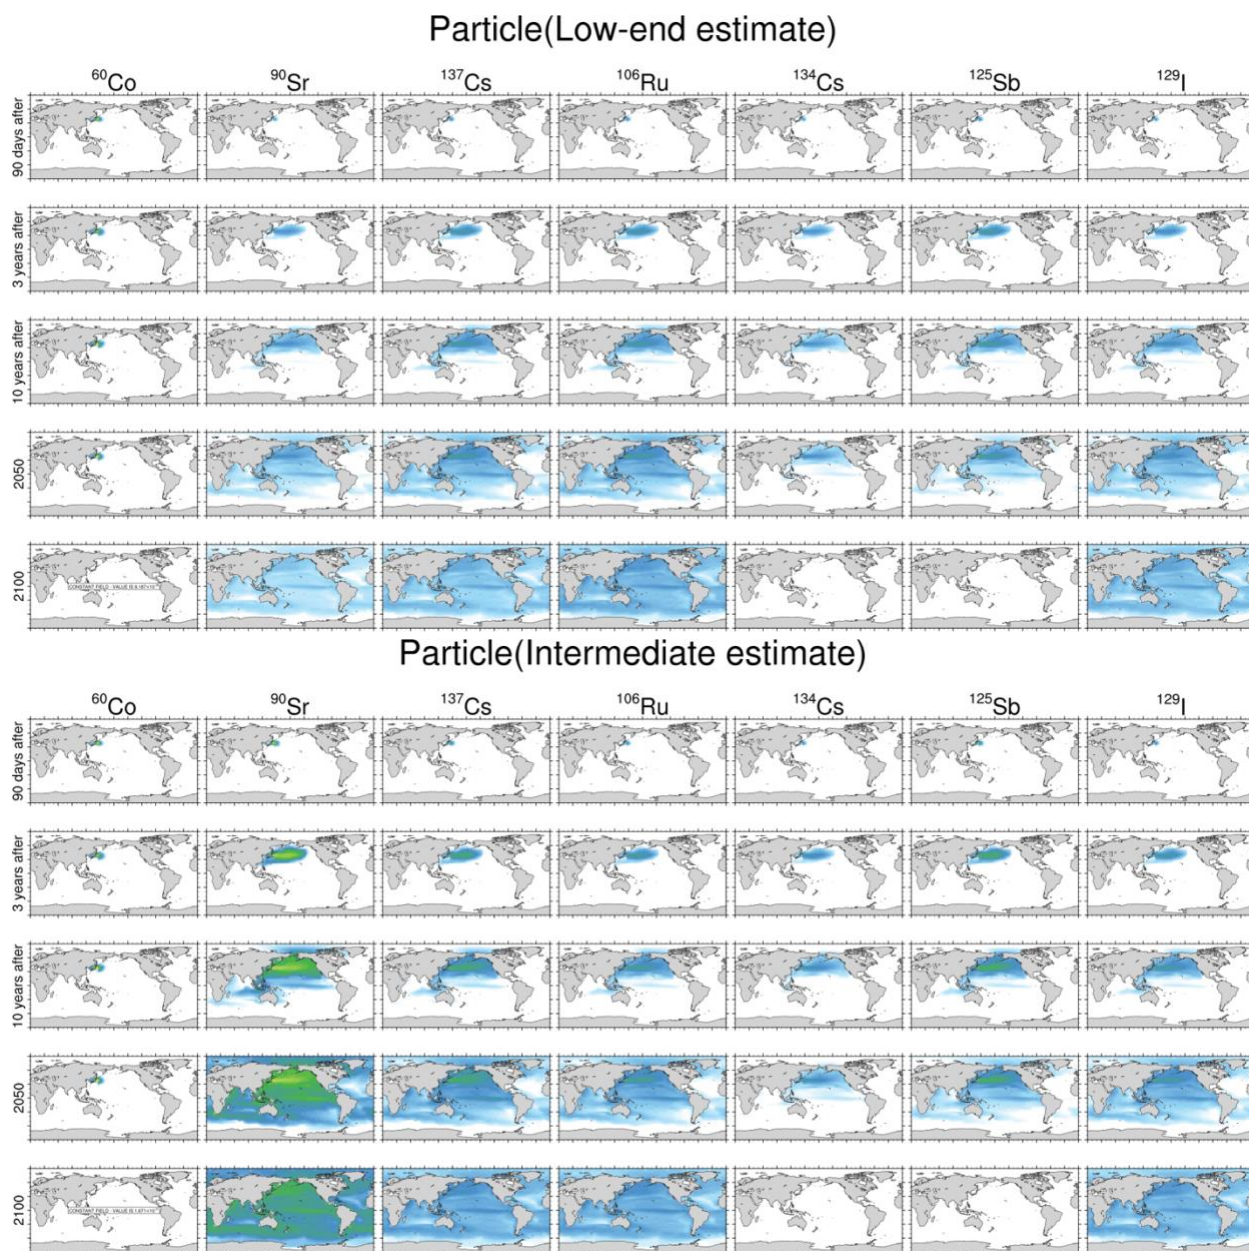

Figure S1. Projected spatial distribution of dissolved and particulate primary radionuclides in the seawater in the 21<sup>st</sup> century ocean under three scenarios.



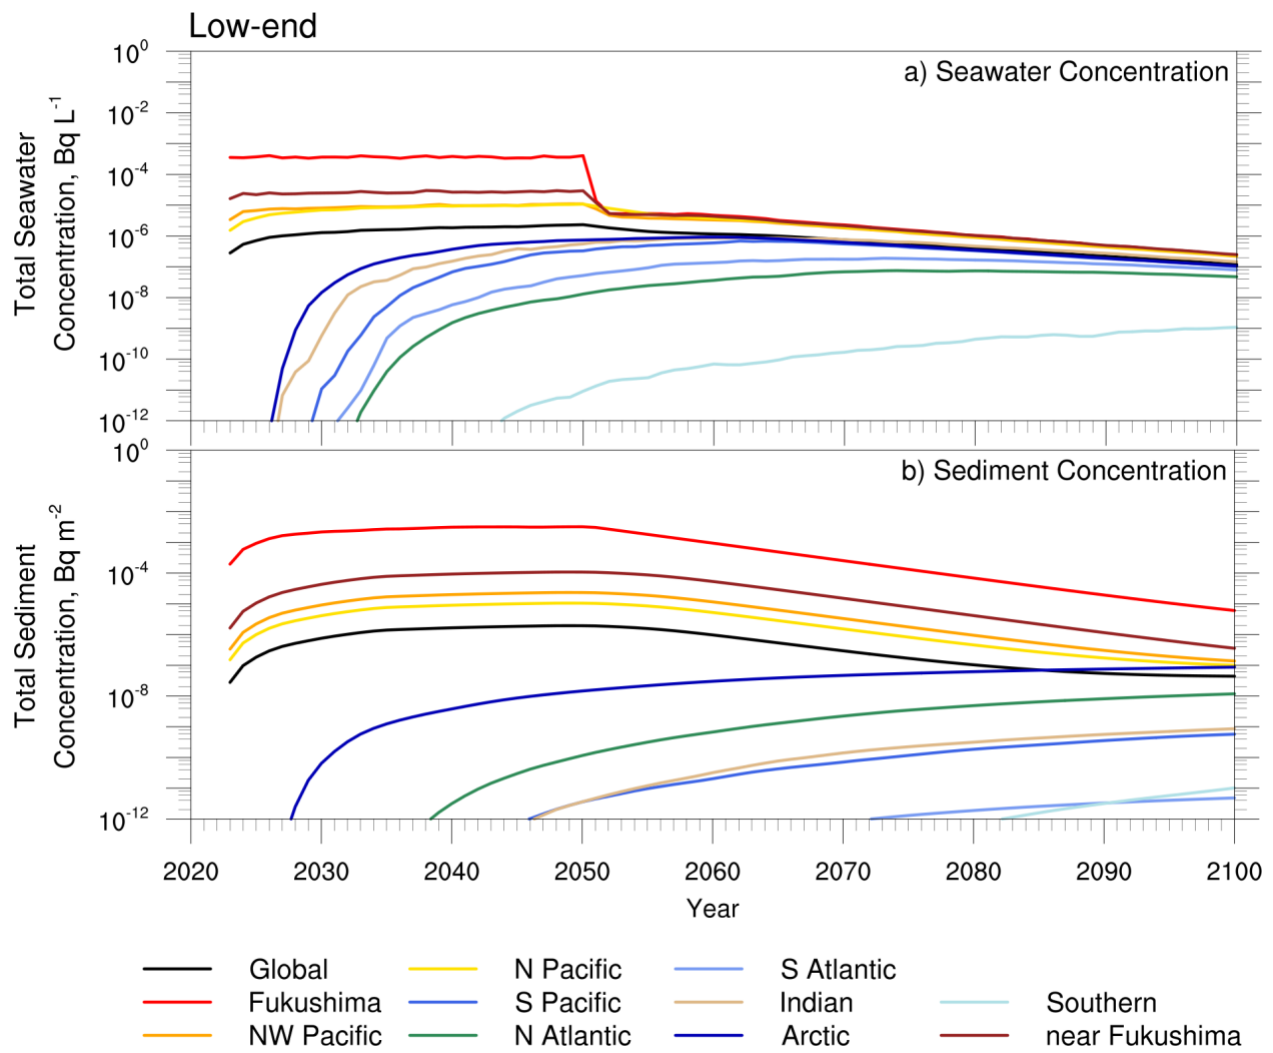

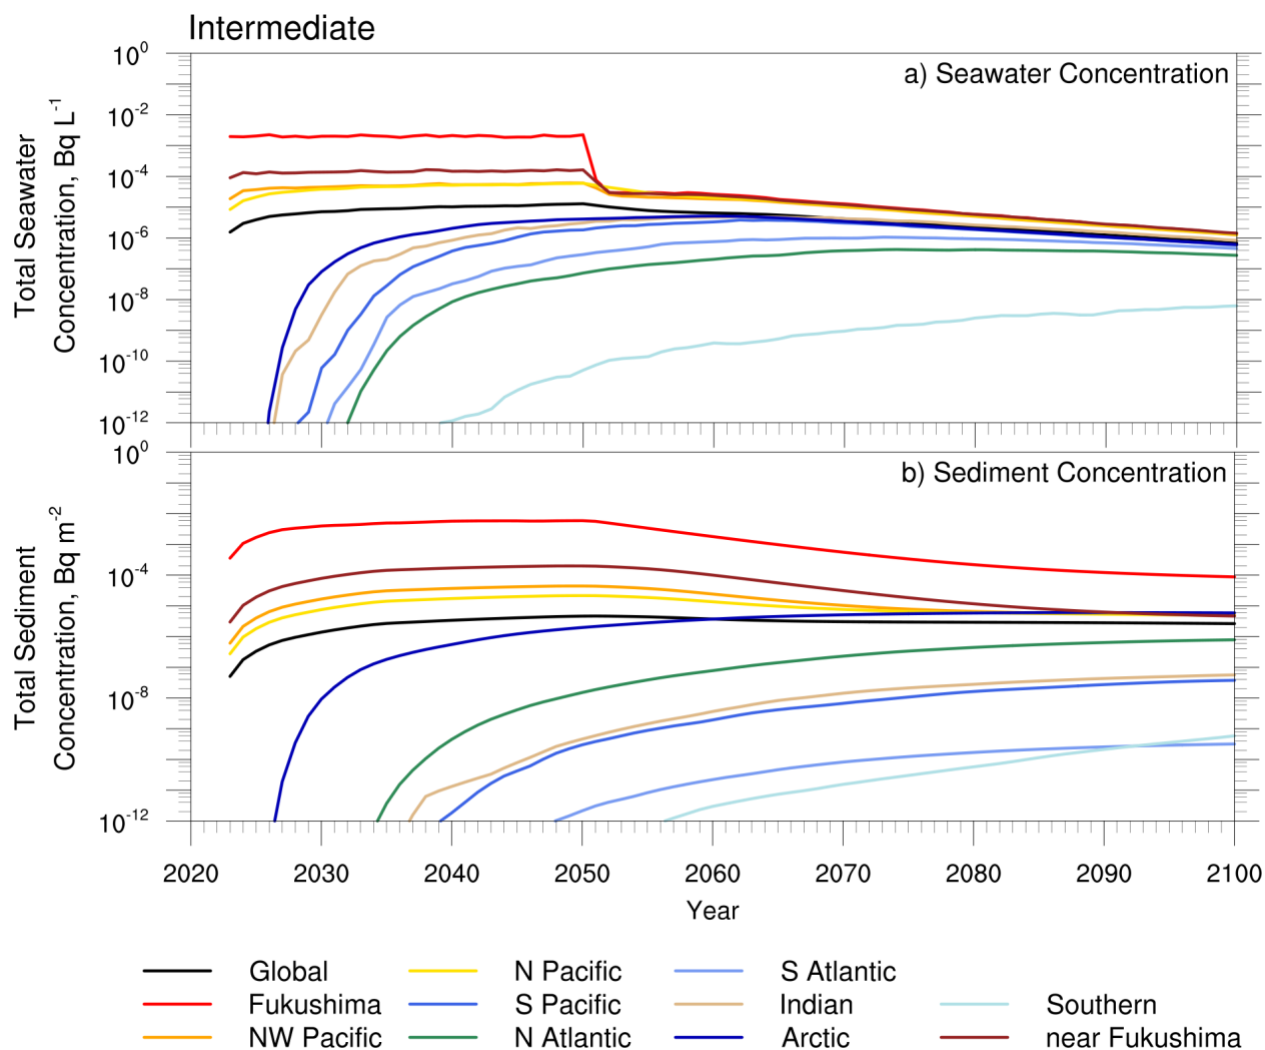

Figure S2. Projected total radionuclide a) concentrations and b) sedimentation fluxes over different ocean basins for low-end and intermedia scenarios.

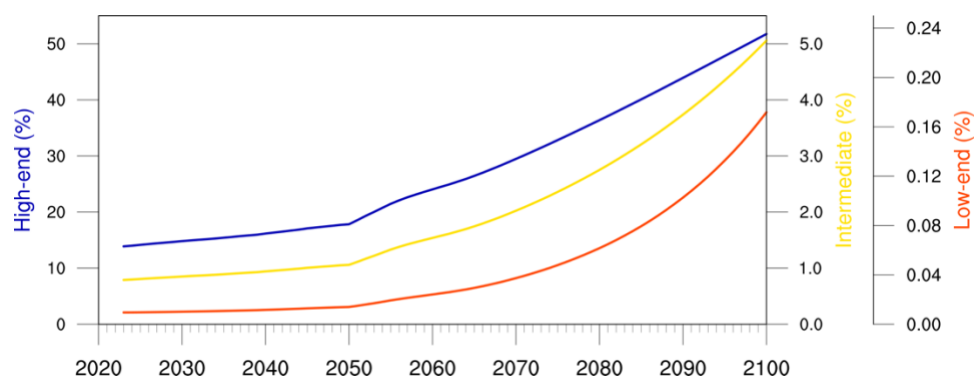

Figure S3. Global average fraction of primary seven nuclides over the total nuclide concentrations. Blue, yellow, and red curves are for high-, intermediate, and low-end emission scenarios, respectively. Note each with a separate y-axis.

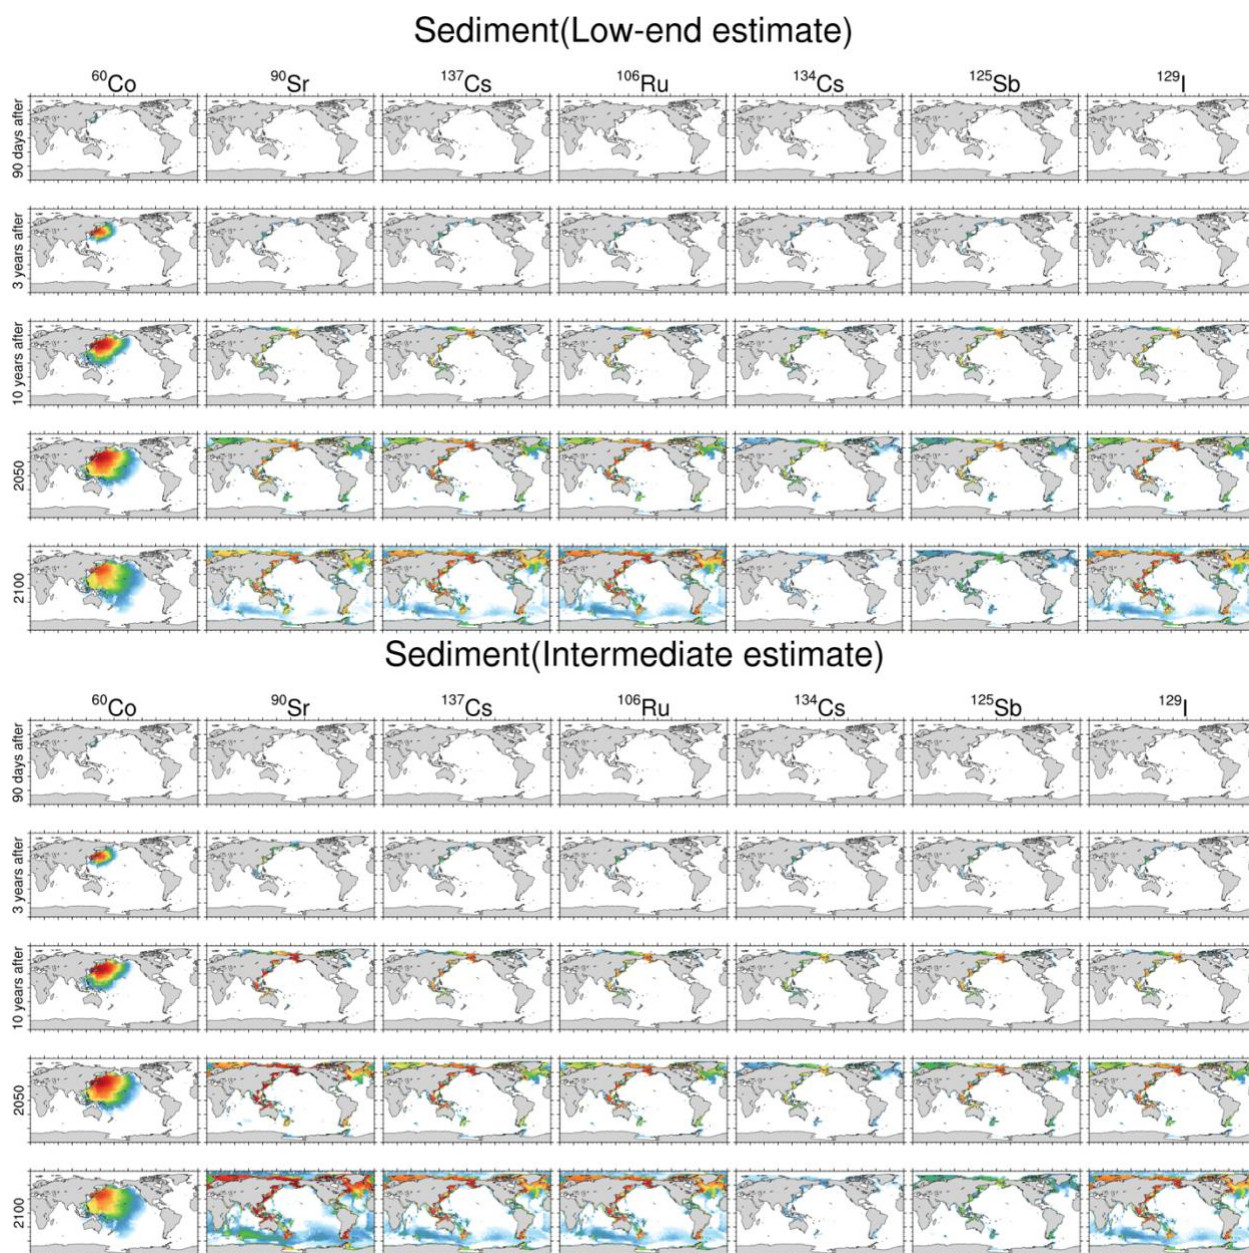

Figure S4. Projected spatial distribution of the sediment flux of primary seven radionuclides in the 21<sup>st</sup> century ocean under the low and intermedia scenarios.

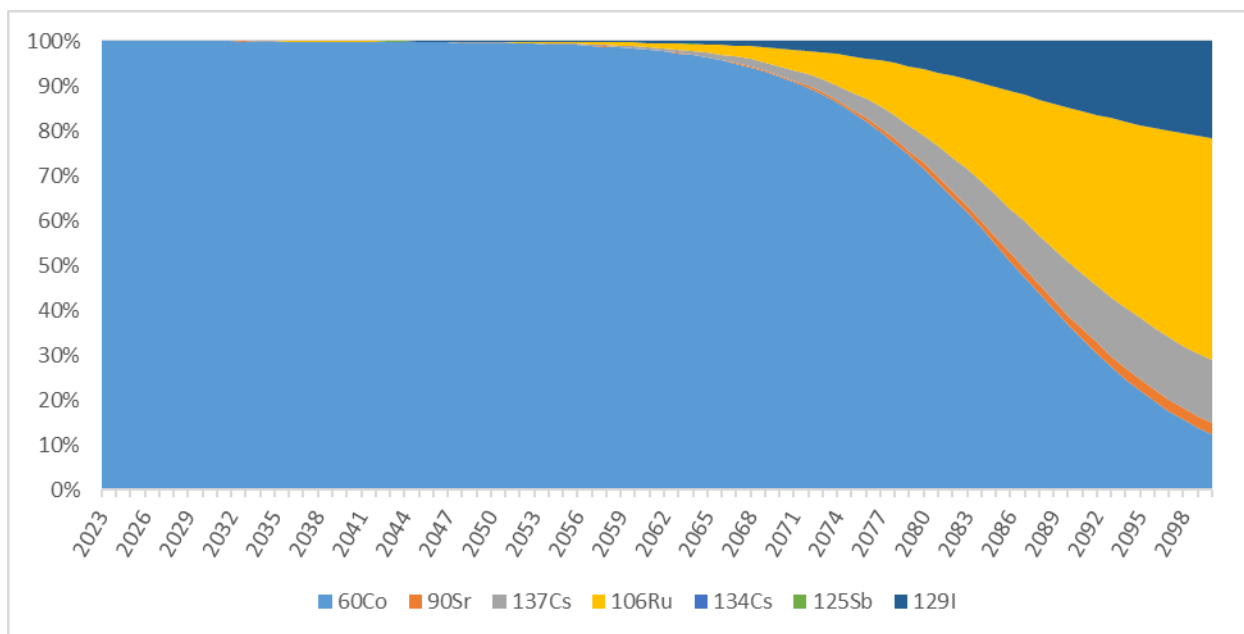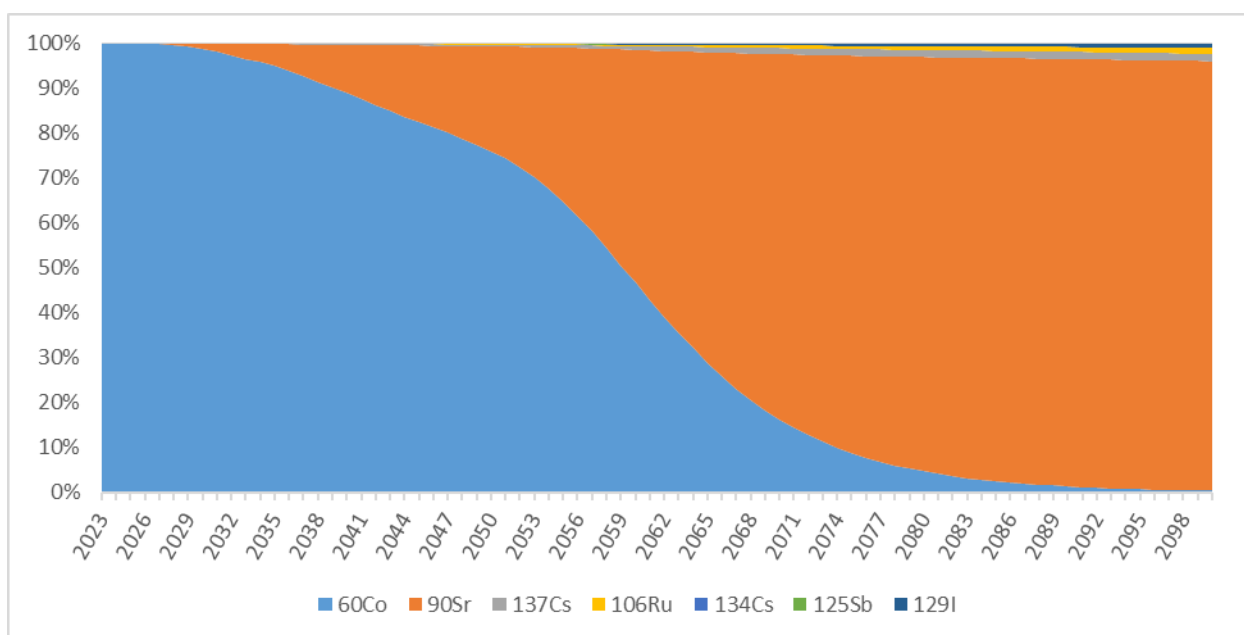



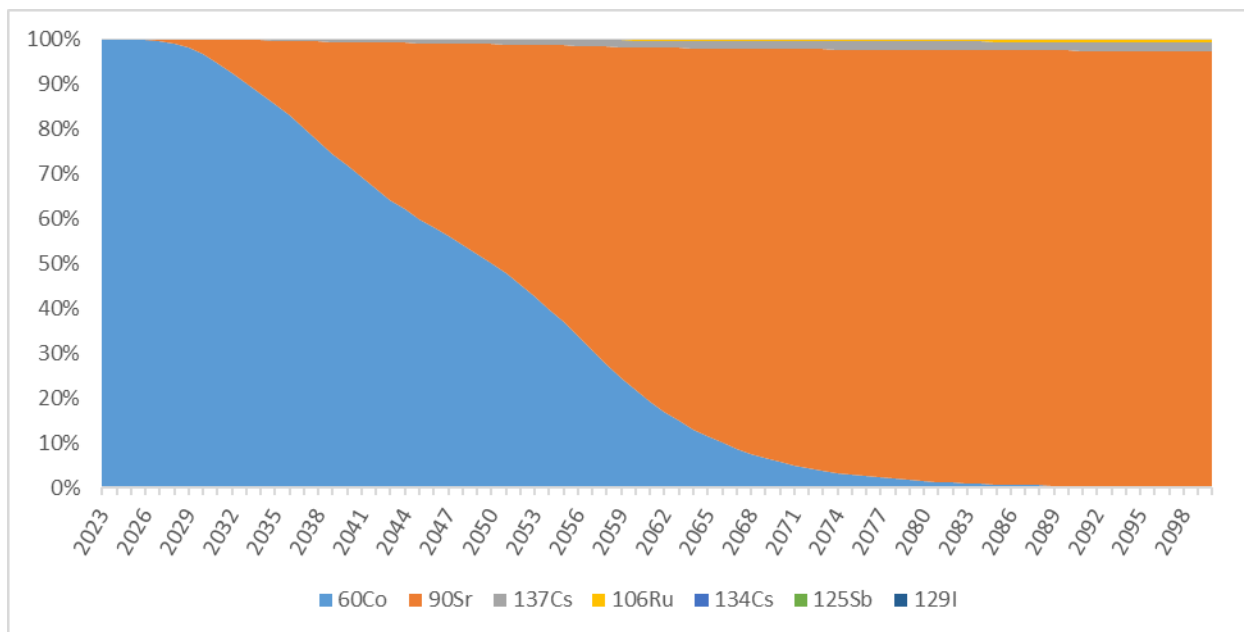

Figure S5. Relative contribution of different nuclides in the global sediments (from top to bottom are low-end scenario, intermediate scenario, and high-end scenario, respectively).

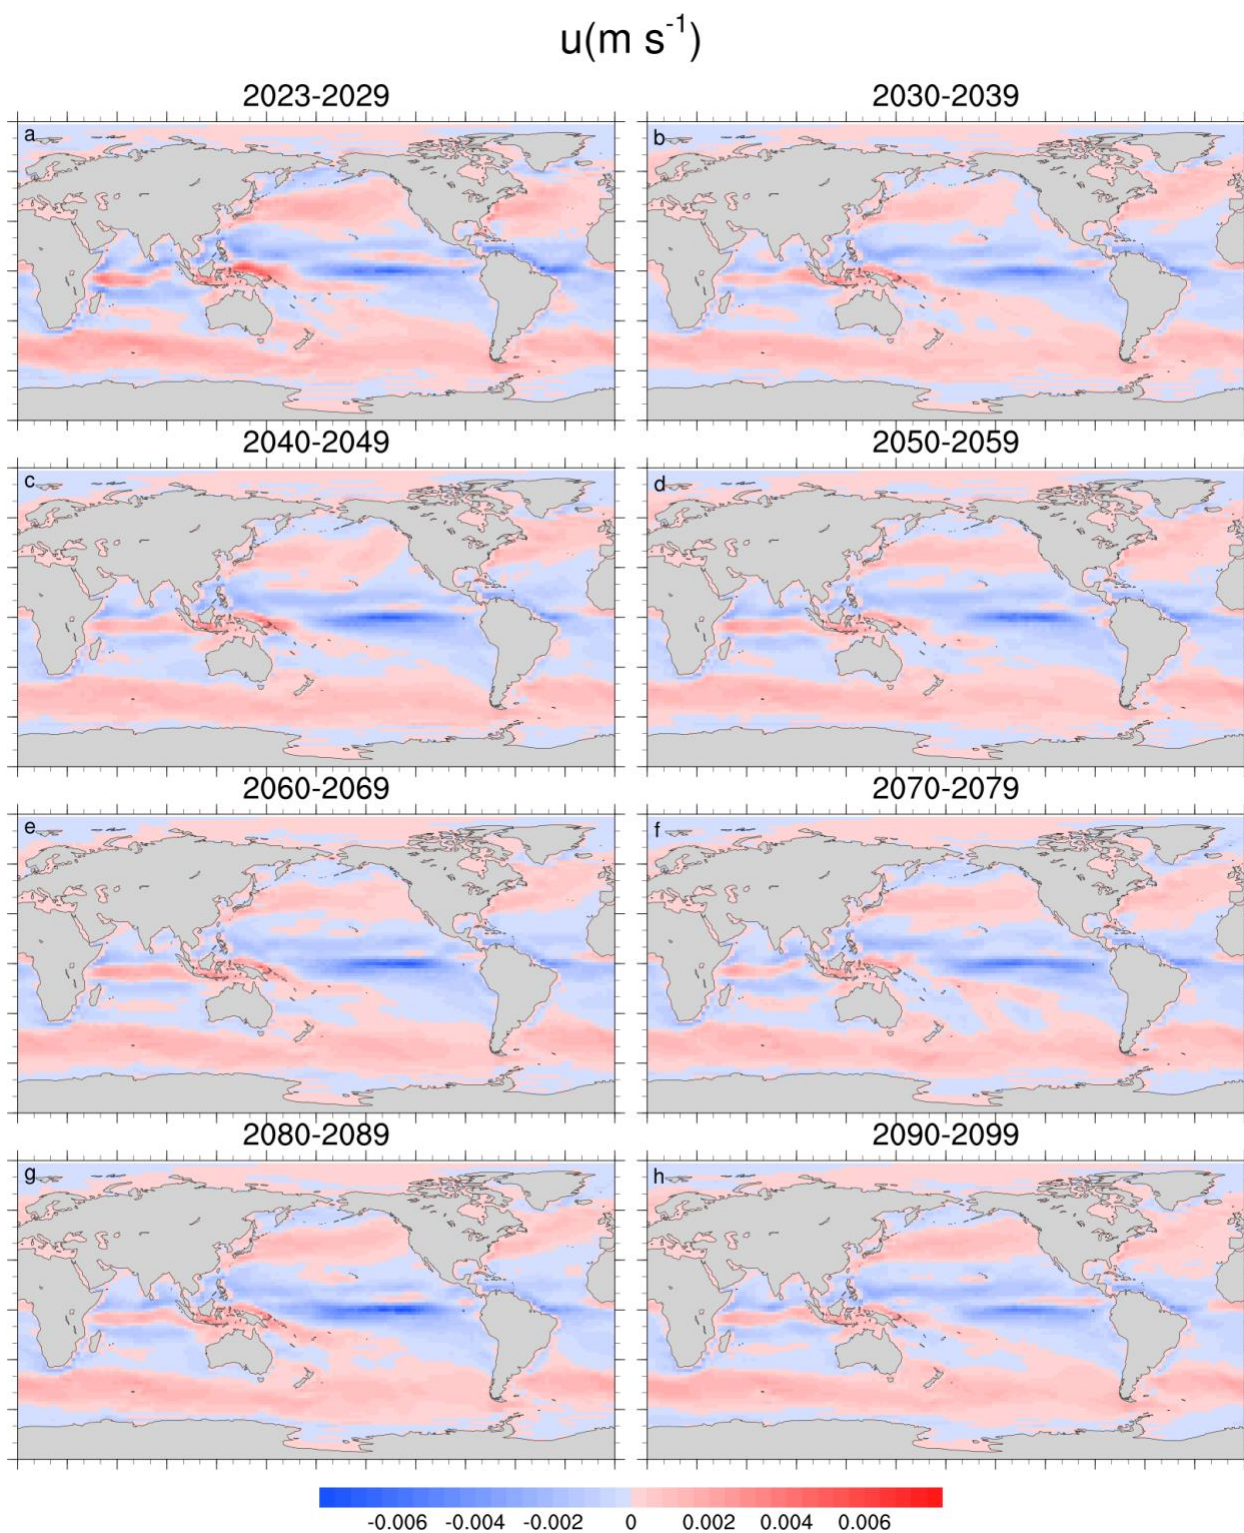

Figure S6. Surface ocean current velocities:  $U$

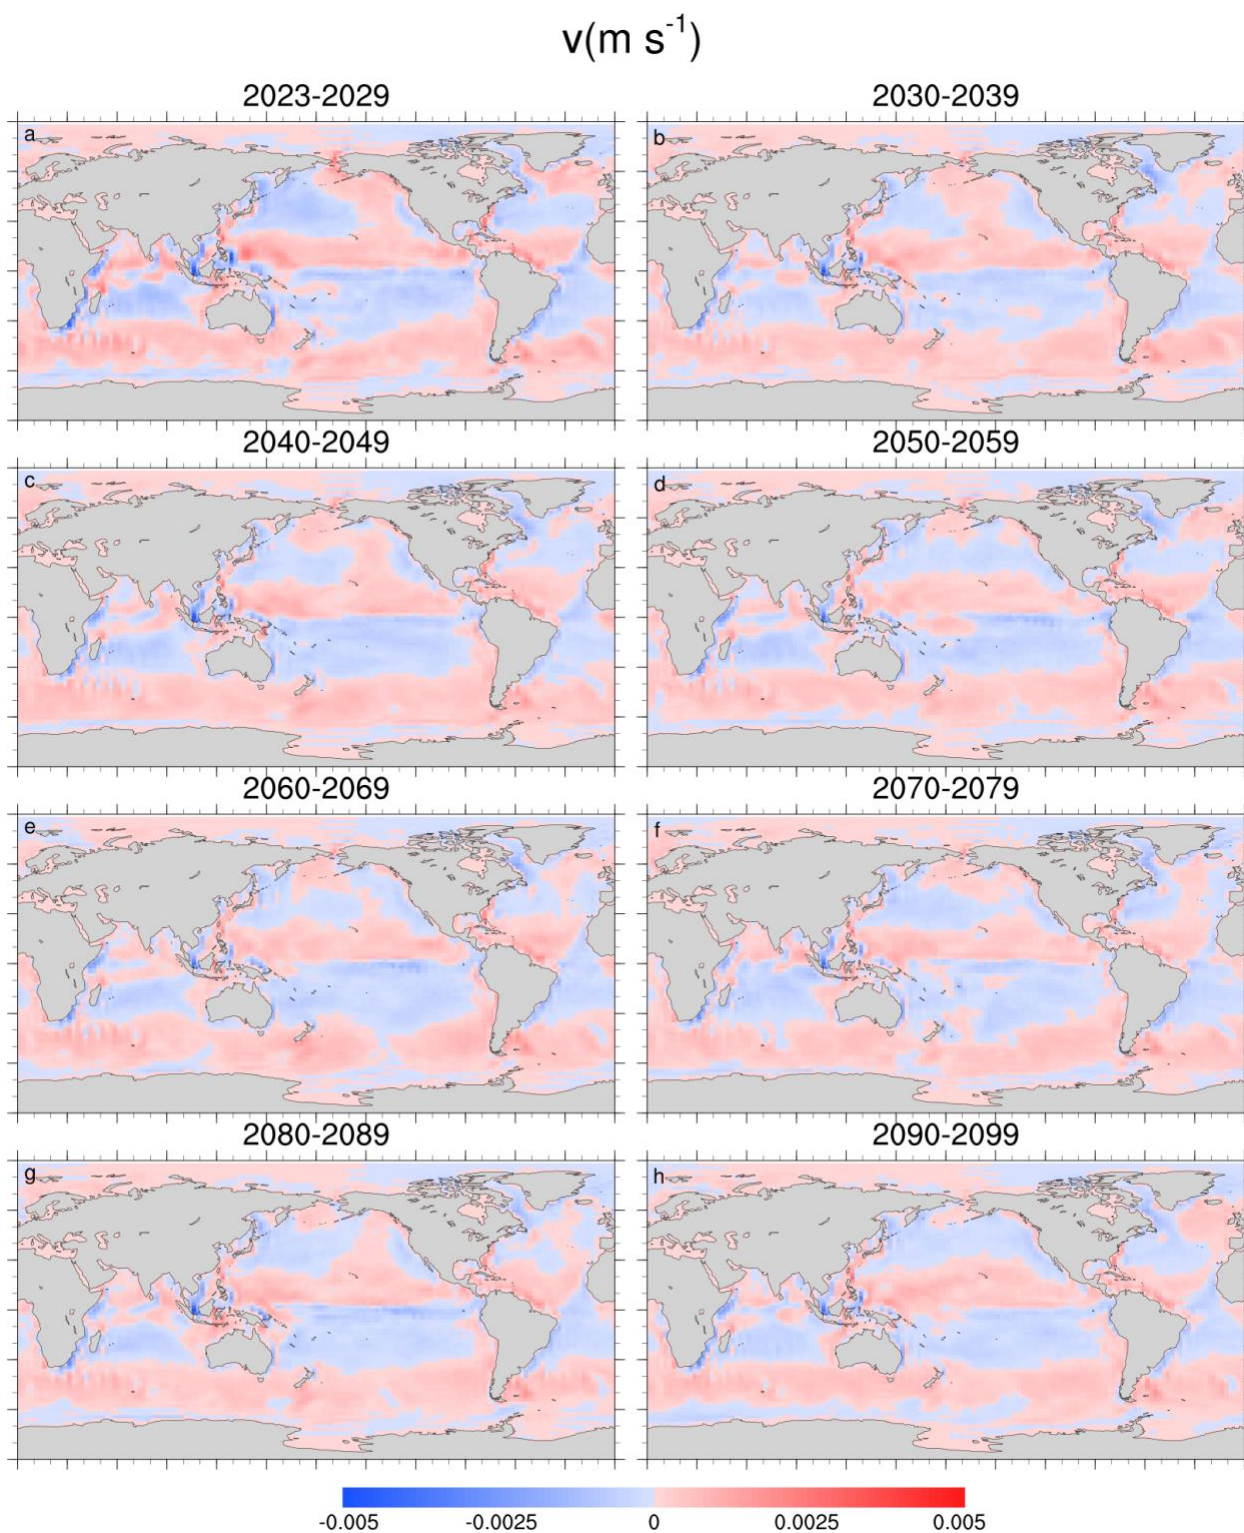

Figure S7. Surface ocean current velocities:  $V$



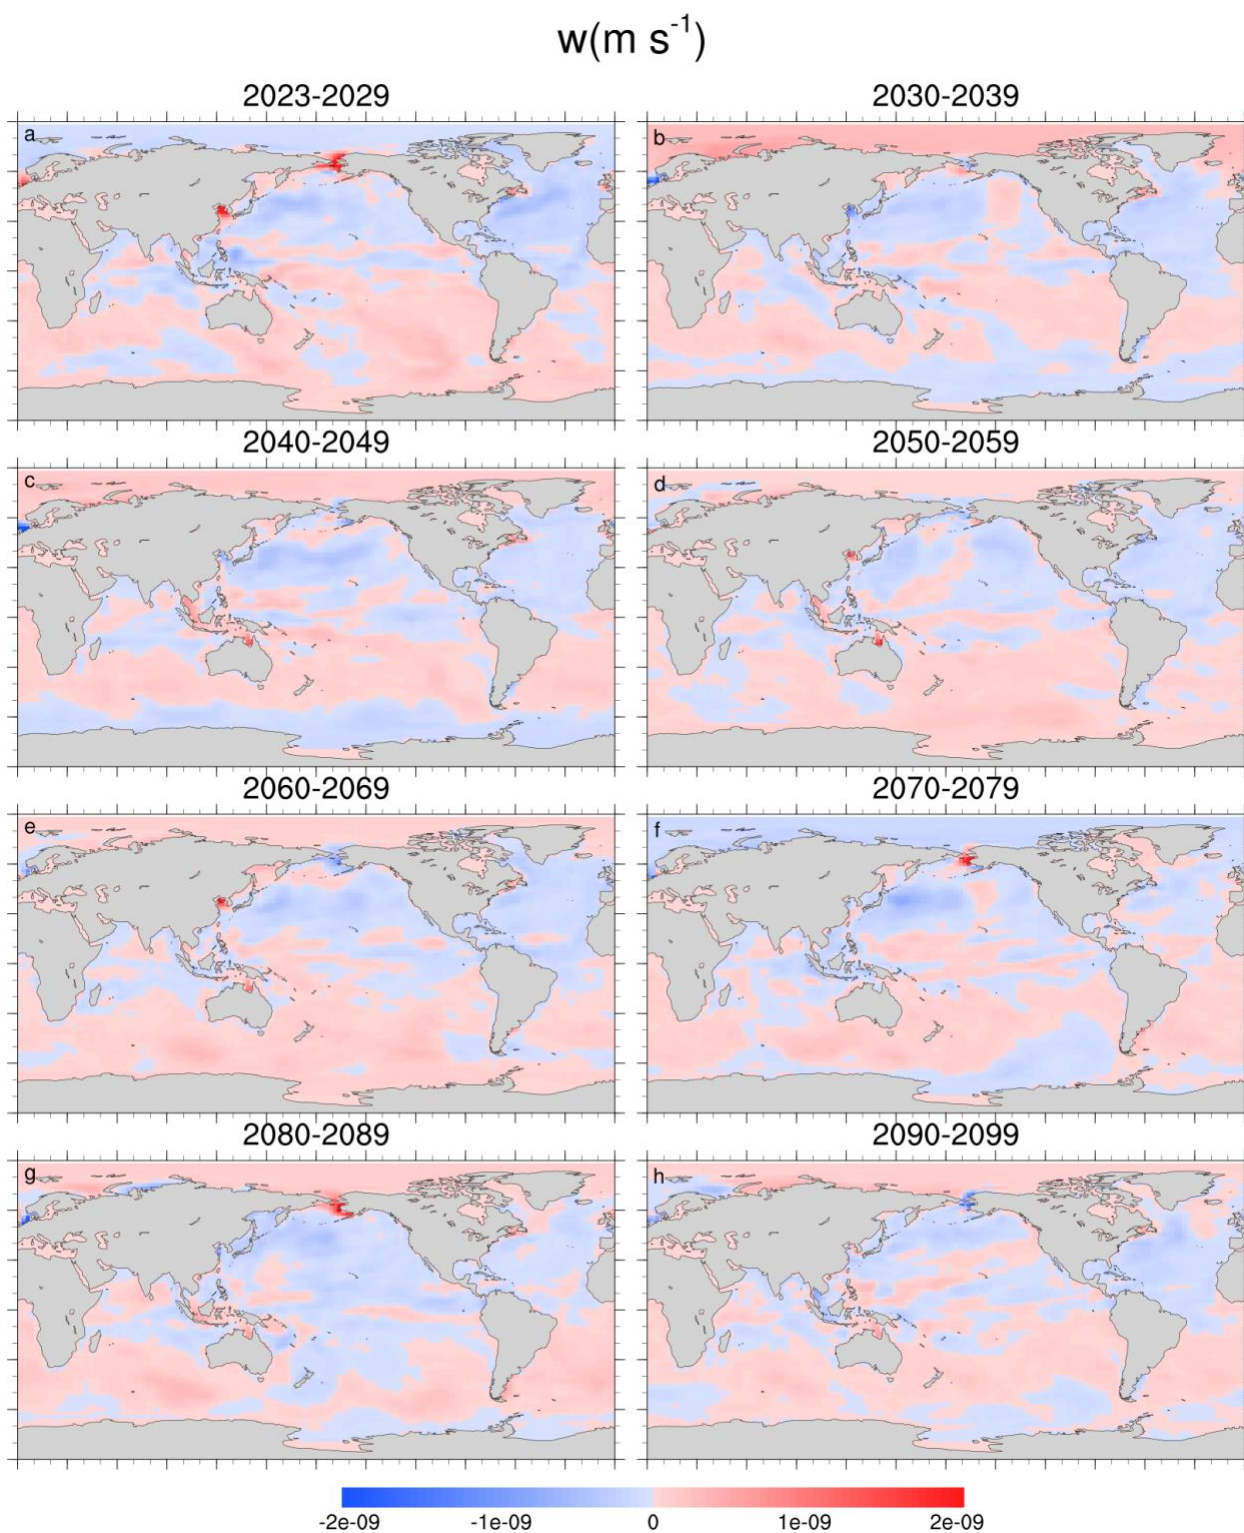

Figure S8. Surface ocean current velocities: W



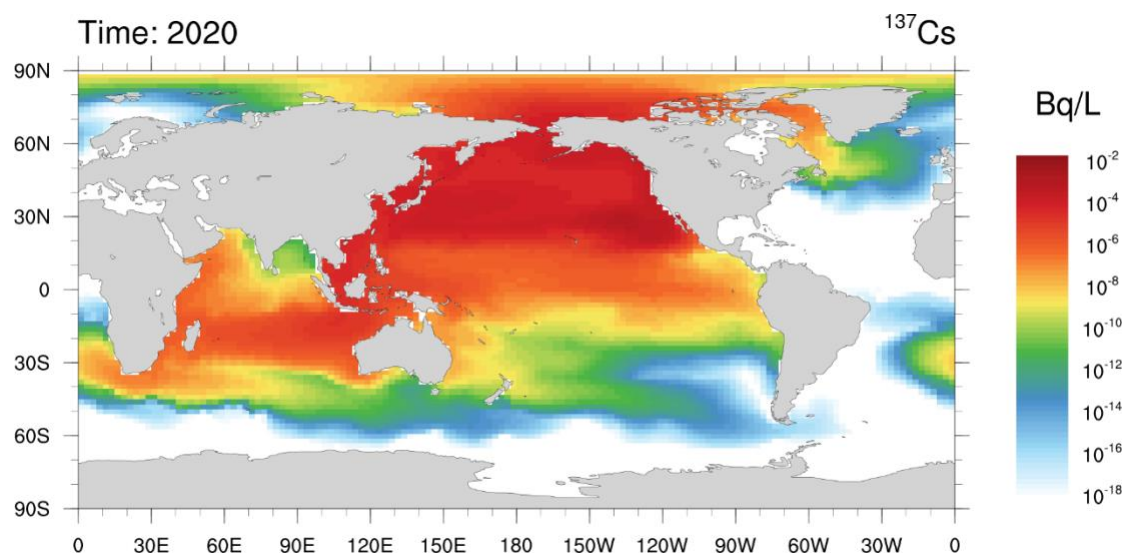

Figure S9. Global distribution of simulated  $^{137}\text{Cs}$  in 2020 from the verification scenario experiment.
